# Supplementary material
Source: Springer Nature journal article supplement (https://www.springermedizin.de/resource/supplementary/12891_2009_730_MOESM4_ESM.pdf/9506280)
Supplement: MOESM4 [file 9506280]

Patients with recent onset lateral elbow pain referred from their general practitioner

Screening by trial doctor

Included  
informed consent  
Baseline assessment

Randomisation

General advice and naproxen 500 mg bid

Excluded  
did not meet  
eligibility criteria  
- did not wish to  
participate

Corticosteroid injection  
Physiotherapy  
(n=60)

Saline injection  
Physiotherapy  
(n=60)

Wait-and-see  
(Control group)  
(n=60)

Corticosteroid injection  
repeated at week 3

Saline injection  
repeated at week 3

Encouragement  
at week 3

Change of doctor

Assessment of outcome measures  
by blinded trial doctor at weeks 6, 12, 26 and 52
